# Supplementary material
Source: MDPI journal article supplement (https://www.mdpi.com/2227-9717/9/6/934)
Supplement: s1 [file s1]

# Supplementary Materials: Insights into Equilibrium and Adsorption Rate of Phenol on Activated Carbon Pellets Derived from Cigarette Butts

Nahum A. Medellín-Castillo <sup>1,2</sup>, Raúl Ocampo-Pérez <sup>3,\*</sup>, Angélica Forgionny <sup>4</sup>, Gladis J. Labrada-Delgado <sup>5</sup>, Ana I. Zárate-Guzmán <sup>3</sup>, Sergio A. Cruz-Briano <sup>2</sup> and Rogelio Flores-Ramírez <sup>2</sup>

<sup>1</sup> Facultad de Ingeniería, Universidad Autónoma de San Luis Potosí, Av. Manuel Nava No. 8,

San Luis Potosí 78290, Mexico; nahum.medellin@uaslp.mx

<sup>2</sup> Programa Multidisciplinario de Posgrado en Ciencias Ambientales, Universidad Autónoma de San Luis Potosí, Av. Manuel Nava No. 201, San Luis Potosí 78210, Mexico; a176832@alumnos.uaslp.mx (S.A.C.-B.); rogelio.flores@uaslp.mx (R.F.-R.)

<sup>3</sup> Centro de Investigación y Estudios de Posgrado, Facultad de Ciencias Químicas, Universidad Autónoma de San Luis Potosí, San Luis Potosí 78260, Mexico; aizg\_08@hotmail.com

<sup>4</sup> Grupo de Materiales con Impacto, Mat&mpac, Facultad de Ciencias Básicas, Universidad de Medellín, Medellín 55450, Colombia; mforigionny@udem.edu.co

<sup>5</sup> División de Materiales Avanzados, Instituto Potosino de Investigación Científica y Tecnológica A.C., San Luis Potosí 78216, Mexico; gladis.labrada@ipicyt.edu.mx

\* Correspondence: raul.ocampo@uaslp.mx

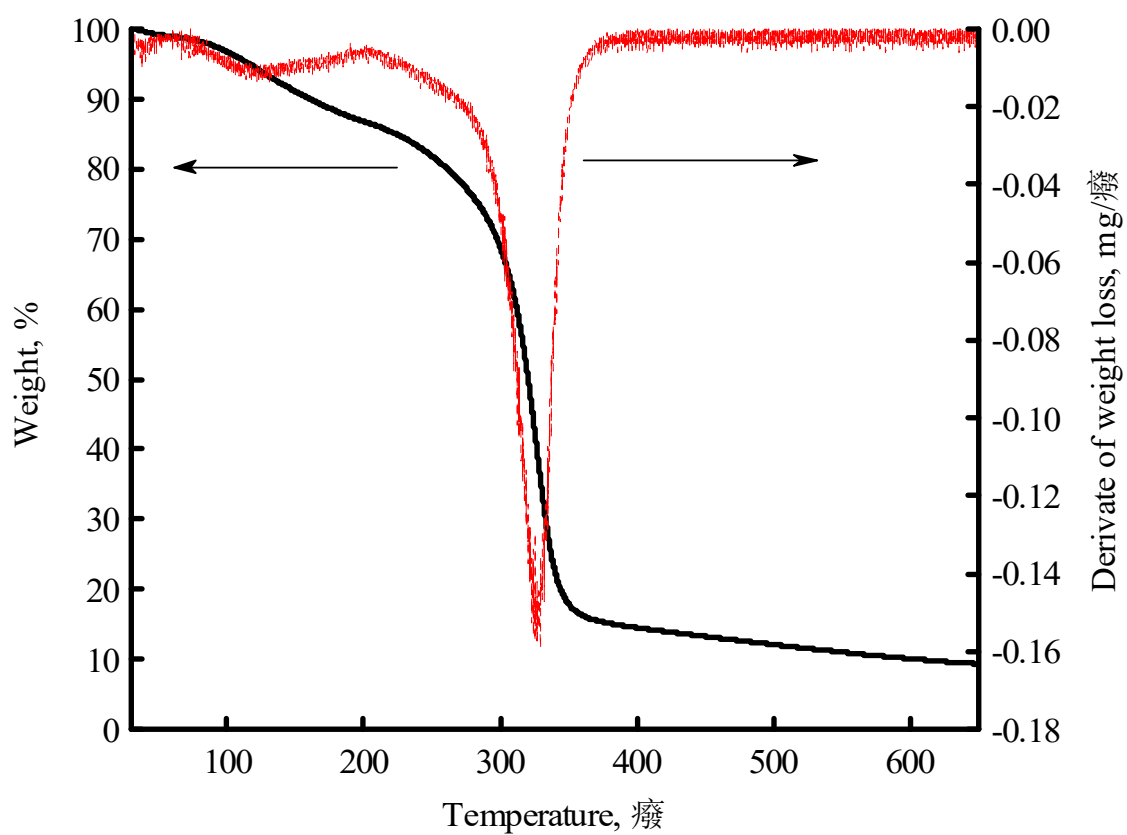

**Figure S1.** Thermogravimetric (TGA) analysis of CBs using N<sub>2</sub> atmosphere.

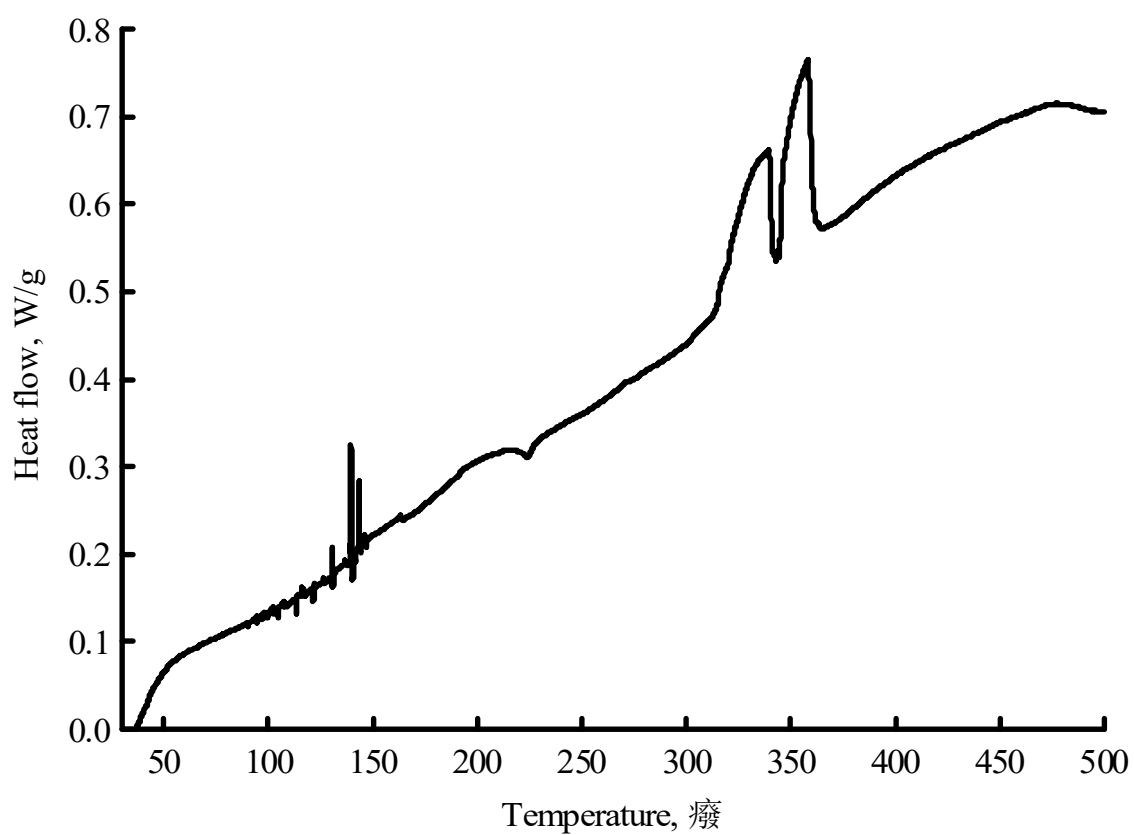

**Figure S2.** Differential scanning calorimetry (DSC) analysis of CBs.

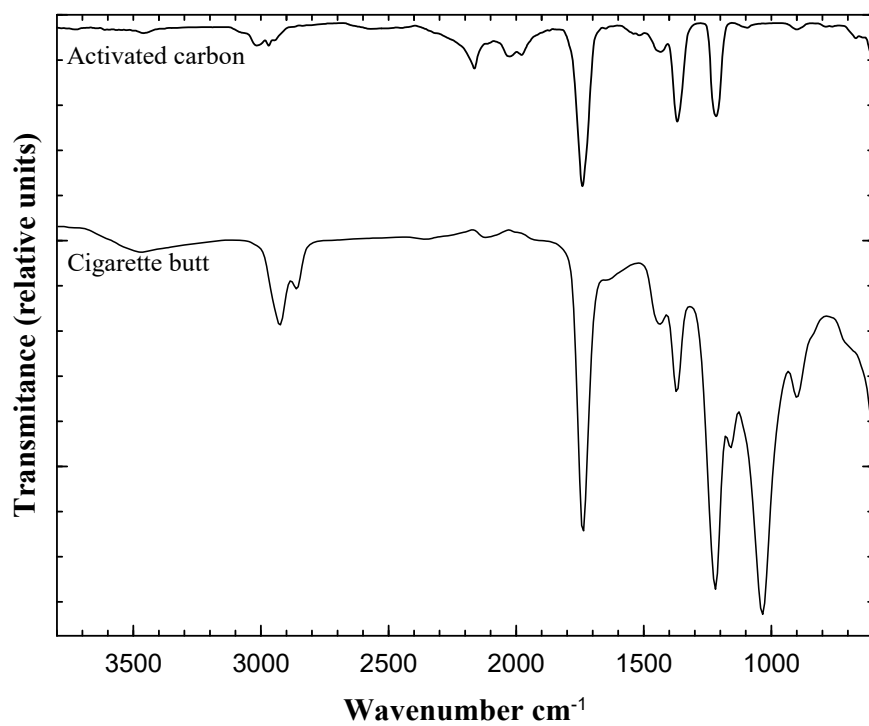

**Figure S3.** FT-IR spectra of CBs and activated carbon pellets.

**Table S1.** Physicochemical characteristics of the wastewater exiting a treatment plant located in San Luis Potosi, Mexico.

| Parameter                                         | Value |
|---------------------------------------------------|-------|
| pH                                                | 8.13  |
| Electrical conductivity ( $\mu\text{S cm}^{-1}$ ) | 489   |
| Chloride ( $\text{mg L}^{-1}$ )                   | 43.0  |
| Sulphate ( $\text{mg L}^{-1}$ )                   | 55.0  |
| Fluoride ( $\text{mg L}^{-1}$ )                   | 1.40  |
| Silica ( $\text{mg SiO}_2 \text{ L}^{-1}$ )       | 22.1  |
| TDS ( $\text{mg L}^{-1}$ )                        | 311   |
| Sodium ( $\text{mg L}^{-1}$ )                     | 52.1  |
| Potassium ( $\text{mg L}^{-1}$ )                  | 9.80  |
| Calcium ( $\text{mg L}^{-1}$ )                    | 25.50 |
| Magnesium ( $\text{mg L}^{-1}$ )                  | 0.70  |
